# Supplementary material
Source: Springer Nature journal article supplement (https://www.springermedizin.de/resource/supplementary/12872_2014_741_MOESM2_ESM.pdf/9430780)
Supplement: MOESM2 [file 9430780]

**A**

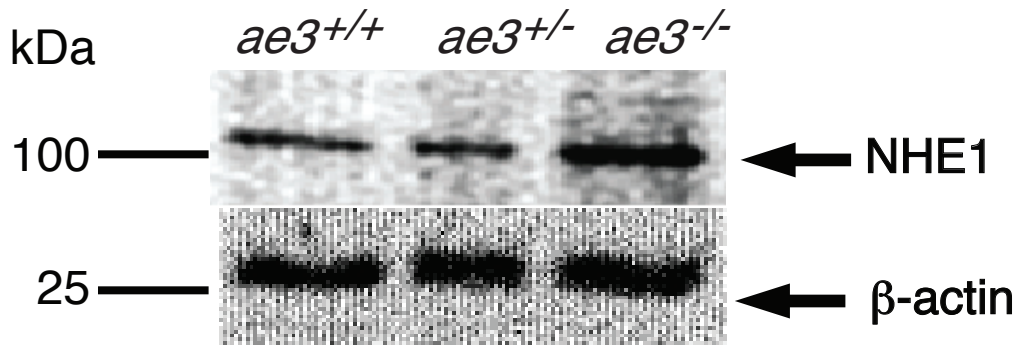

**B**

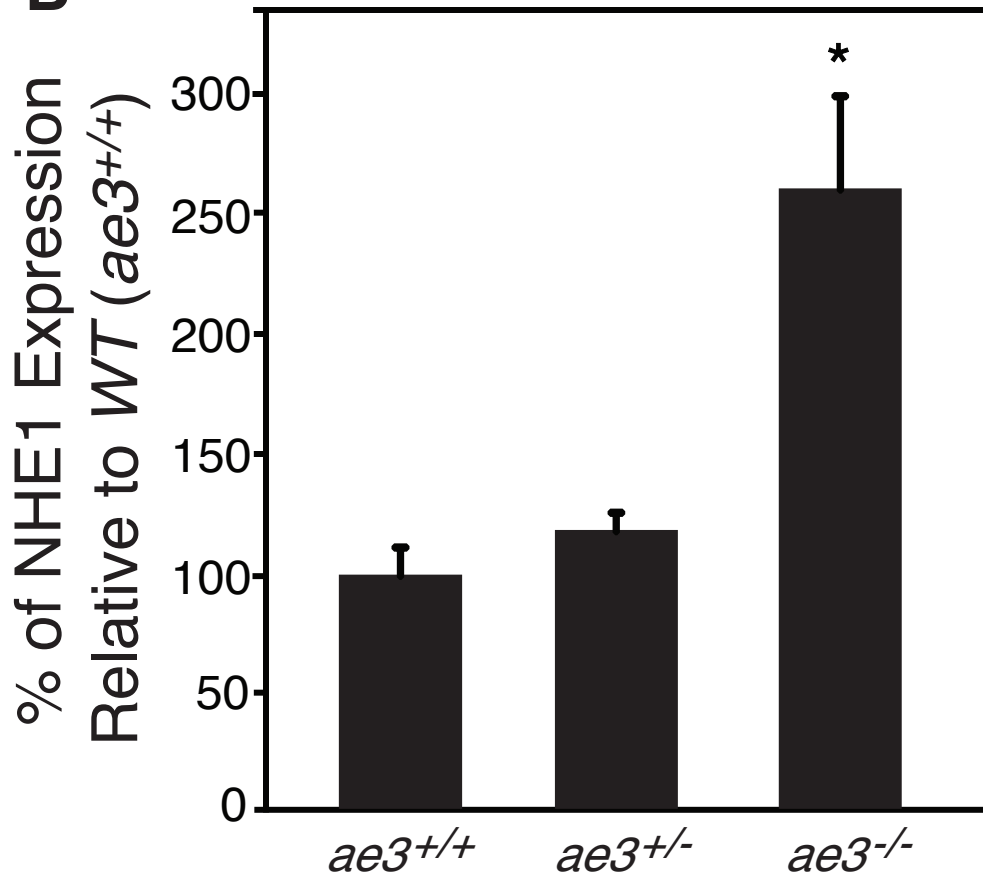

Supplementary Figure 2
